# Supplementary material for: Interaction of a dengue virus NS1‐derived peptide with the inhibitory receptor KIR3DL1 on natural killer cells
Source: PubMed Central journal article supplement (PMC4750593; doi:10.1111/cei.12722), 2015-11-24
Supplement: CEI-183-419-s001.pdf [file CEI-183-419-s001.pdf]

## Supplemental Figure 1

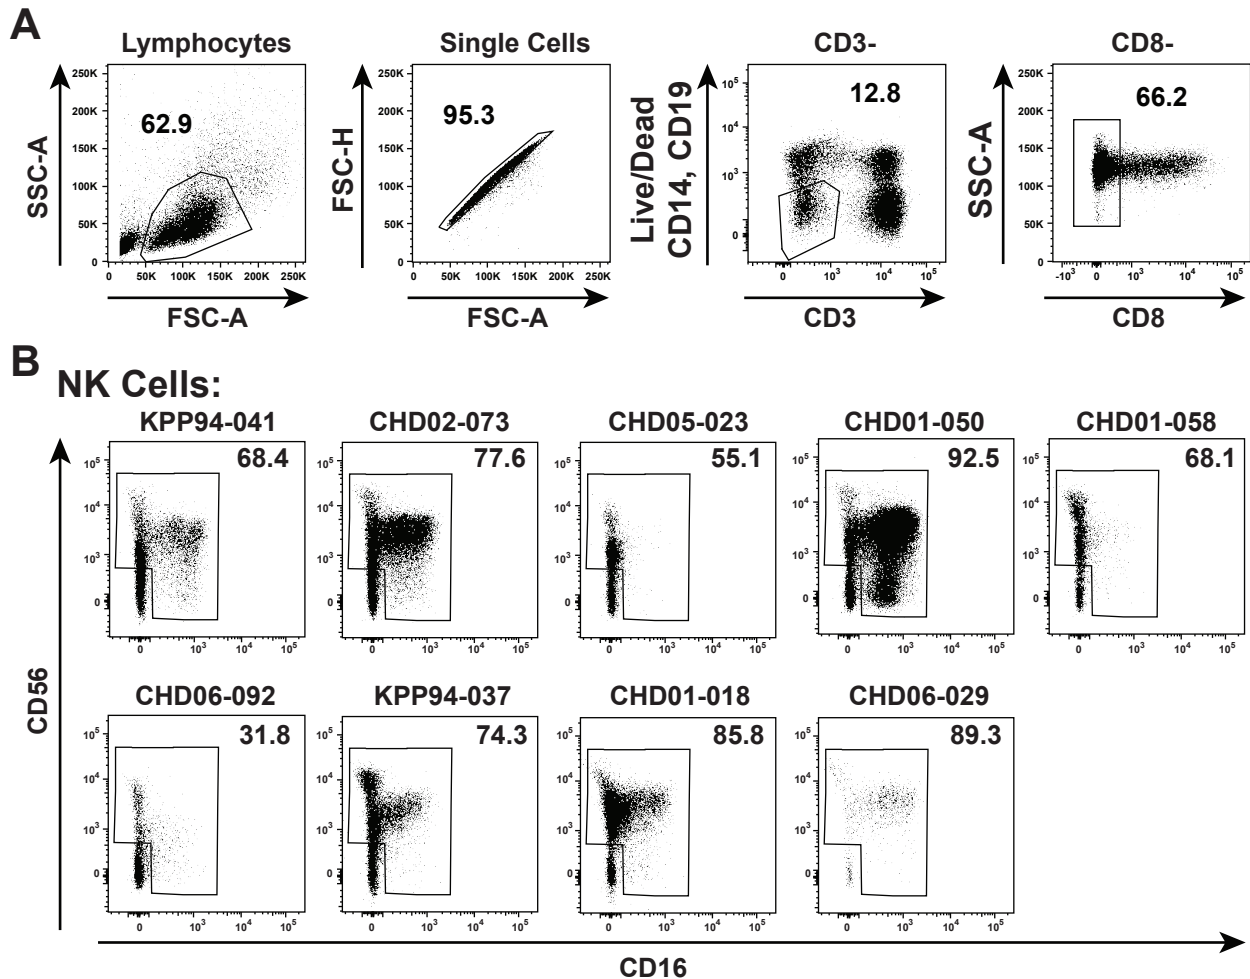

**Supplemental Figure S1.** Frequencies of NK cells in the CD3-CD8-CD14-CD19<sup>-</sup> gate. (A) Gating strategy to identify CD3-CD8-CD14-CD19<sup>-</sup> cells. Cells were first selected within the lymphocyte gate as defined by forward and side scatter profiles. Singlets were then identified and live CD3-CD14-CD19<sup>-</sup> cells were selected in a dump (LIVE/DEAD<sup>®</sup> Green with  $\alpha$ CD14 and  $\alpha$ CD19) versus CD3 bivariate plot. CD8<sup>-</sup> cells were gated within this population. (B) Frequencies of CD56<sup>+</sup> and/or CD16<sup>+</sup> NK cells in PBMCs collected from Thai cohort subjects 2 years after acute DENV infection. Plots are gated on live CD3-CD8-CD14-CD19<sup>-</sup> cells.

Supplemental Figure 2

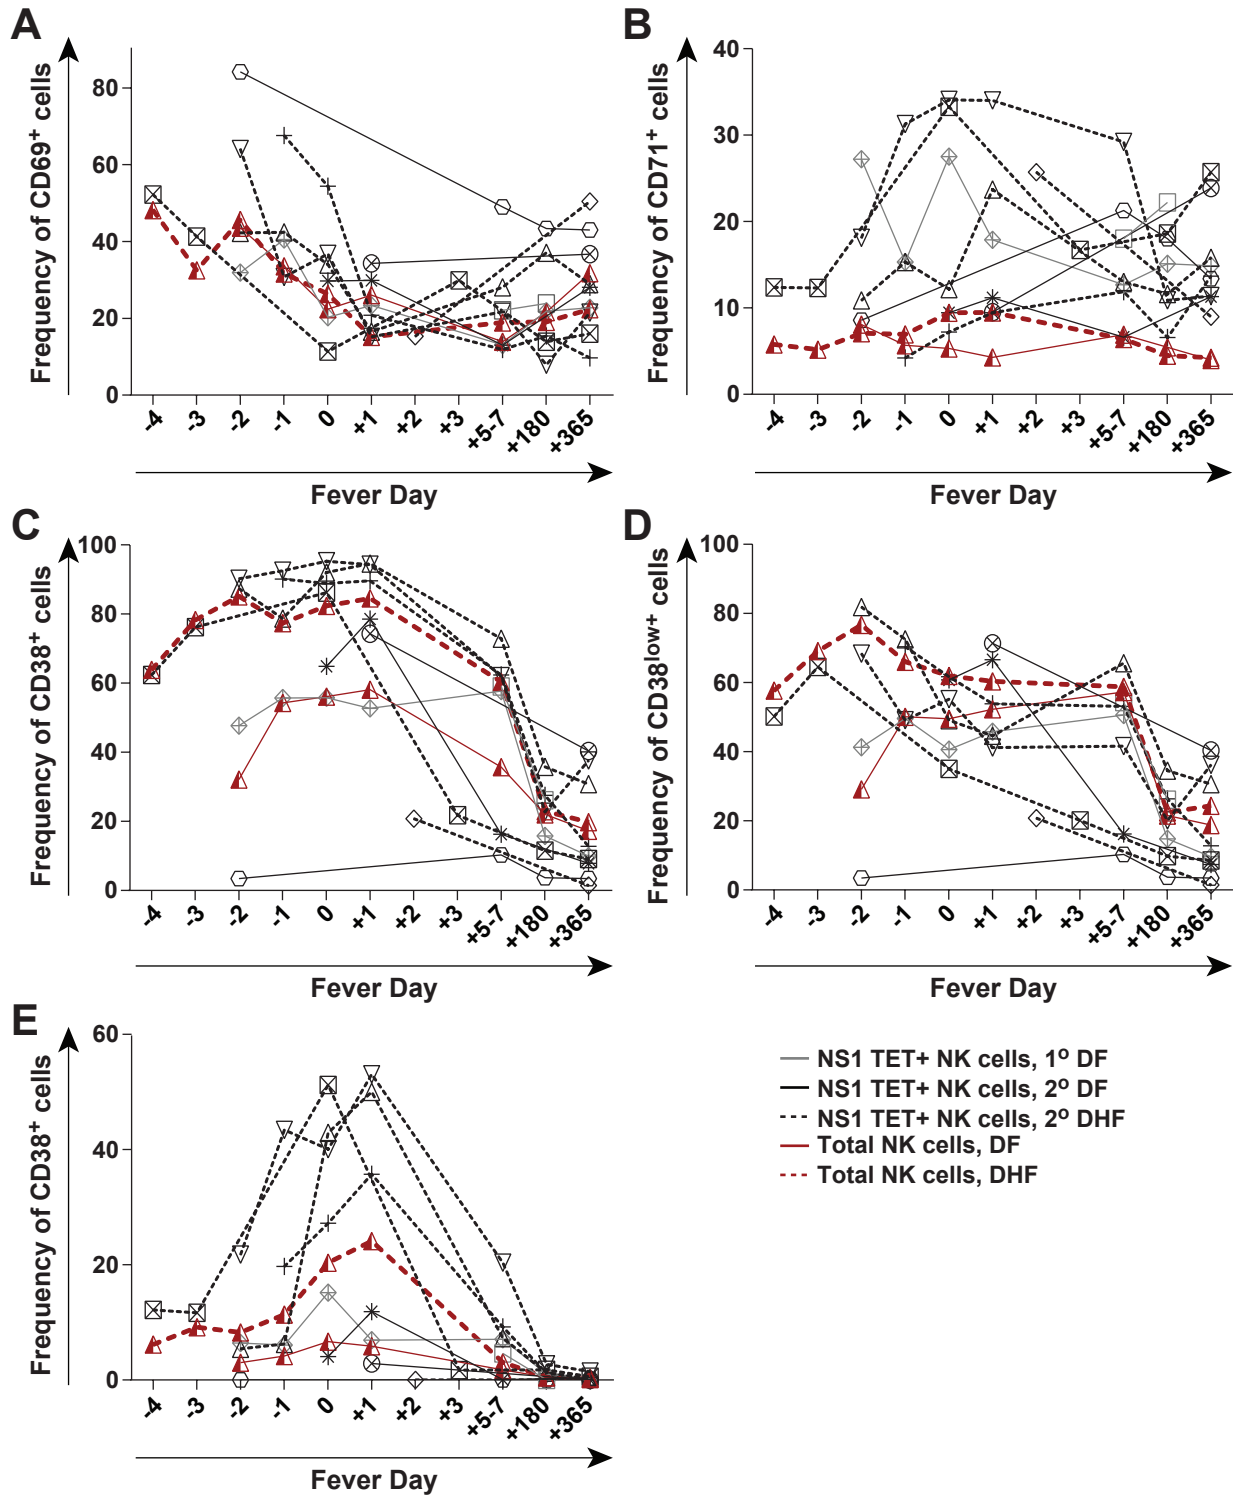

**Supplemental Figure S2.** Activation of NS1 TET<sup>+</sup> and total NK cells over the course of acute dengue illness. Kinetics of CD69 (A), CD71 (B), total CD38 (C), CD38<sup>low</sup> (D), and CD38<sup>hi</sup> (E) expression on NS1 TET<sup>+</sup> and total NK cells during acute dengue illness and convalescence. The average frequencies of CD69<sup>+</sup>, CD71<sup>+</sup>, total CD38<sup>+</sup>, CD38<sup>low</sup>, and CD38<sup>hi</sup> total NK-enriched cells are shown using a solid red line for subjects with DF and a dashed red line for subjects with DHF. Symbols distinguish subjects with primary ( $n=2$ , grey symbols) versus secondary ( $n=8$ , black symbols) DENV infections and lines distinguish those with DF ( $n=5$ , black line) versus DHF ( $n=5$ , dashed line).

### Supplemental Figure 3

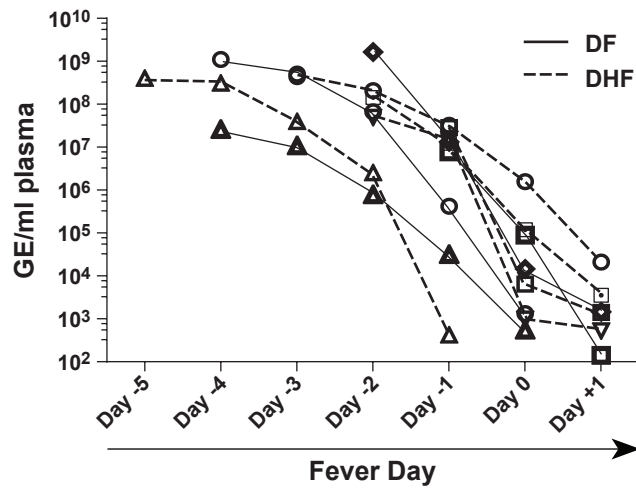

**Supplemental Figure S3.** Magnitude of DENV viremia by day of illness. Levels of DENV genome equivalent (GE) cDNA (copies/mL) were determined in serial plasma samples from HLA-B57<sup>+</sup> patients. Symbols denote individual subjects and lines distinguish those with DF ( $n=4$ , black line) versus DHF ( $n=5$ , dashed line).

SUPPLEMENTAL TABLE 1: Antibodies used for flow cytometry studies

| <b>Marker</b>     | <b>Clone</b> | <b>Manufacturer</b> | <b>Fluorochrome</b>           |
|-------------------|--------------|---------------------|-------------------------------|
| <b>CD3</b>        | UCHT1        | BD Biosciences      | V500                          |
|                   |              | BioLegend           | BV510                         |
|                   | OKT3         | BioLegend           | BV510                         |
| <b>CD8</b>        | SK1          | Invitrogen          | PE-AlexaFluor610              |
| <b>CD45RA</b>     | HI100        | BD Pharmingen       | APC-H7                        |
| <b>CCR7</b>       | 150503       | BD Horizon          | V450                          |
| <b>CD69</b>       | CH/4         | Invitrogen          | PE-Cy5.5                      |
|                   | FN50         | BioLegend           | BV650                         |
| <b>CD38</b>       | HB7          | eBioscience         | eFluor@650NC                  |
| <b>CD57</b>       | HCD57        | BioLegend           | PerCP/Cy5.5 (Lightening Link) |
| <b>CD71</b>       | OKT9         | eBioscience         | PE-Cy7 (Lightening Link)      |
|                   | CY1G4        | BioLegend           | APC                           |
| <b>CD28</b>       | CD28.2       | BioLegend           | AlexaFluor700                 |
| <b>CD56</b>       | B159         | BD Biosciences      | AlexaFluor700                 |
| <b>CD19</b>       | HIB19        | BD Biosciences      | FITC                          |
| <b>CD14</b>       | HCD14        | BioLegend           | FITC                          |
| <b>CD56</b>       | HCD56        | BioLegend           | BV711                         |
| <b>CD16</b>       | 3G8          | BD Horizon          | APC-H7                        |
| <b>NKp30</b>      | P30-15       | BioLegend           | APC                           |
| <b>NKp46</b>      | 9E2          | BioLegend           | BV421                         |
| <b>CD161</b>      | HP-3G10      | BioLegend           | BV605                         |
| <b>NKG2D</b>      | 1D11         | BD Biosciences      | PE-CF594                      |
| <b>KIR3DL1</b>    | DX9          | Beckman Coulter     | PE                            |
|                   |              | BioLegend           | PE                            |
| <b>KIR3DL1/S1</b> | Z27          | Beckman Coulter     | APC                           |
| <b>HLA-A,B,C</b>  | W6/32        | BD Biosciences      | APC, PE, FITC                 |
|                   |              | BioLegend           | PE                            |
| <b>HLA-B57</b>    | BIH0243      | One Lambda          | PE-NeutrAvidin                |
